1 **A homeobox gene, *BarH-1*, underlies a female alternative life-history strategy**

2

3 Alyssa Woronik\*<sup>1</sup>, Kalle Tunström<sup>1</sup>, Michael W. Perry<sup>2</sup>, Ramprasad Neethiraj<sup>1</sup>, Constanti  
4 Stefanescu<sup>3,4</sup>, Maria de la Paz Celorio-Mancera<sup>1</sup>, Oskar Brattström<sup>5</sup>, Jason Hill<sup>1</sup>, Philipp  
5 Lehmann<sup>1</sup>, Reijo Käkälä<sup>6</sup>, Christopher W. Wheat\*<sup>1</sup>

6

7 **Author affiliations:**

8 1 Department of Zoology, Stockholm University, S106 91 Stockholm, Sweden

9 2 Department of Biology, New York University, New York, New York 10003, USA

10 3 Museum of Natural Sciences of Granollers, Granollers, Catalonia 08402, Spain

11 4 CREA, Cerdanyola del Valles, Catalonia 08193, Spain

12 5 Department of Zoology, University of Cambridge, Cambridge CB23EJ, United Kingdom

13 6 Helsinki University Lipidomics Unit, Helsinki Institute for Life Science (HiLIFE) and Molecular  
14 and Integrative Biosciences Research Programme, University of Helsinki, FI00014 Helsinki,  
15 Finland

16

17 **Corresponding authors:**

18 AW [alyssa.woronik@zoologi.su.se](mailto:alyssa.woronik@zoologi.su.se) and CWW [chris.wheat@zoologi.su.se](mailto:chris.wheat@zoologi.su.se)

19

20

21 *Colias* butterflies (the “clouded sulphurs”) often occur in mixed populations where females  
22 exhibit two color morphs, yellow/orange or white. White females, known as the Alba morph,  
23 reallocate resources from the synthesis of costly colored pigments to reproductive and somatic  
24 development <sup>1</sup>. Due to this tradeoff Alba females develop faster and have higher fecundity than  
25 orange females <sup>2</sup>. However orange females, that have instead invested in pigments, are  
26 preferred by males who in turn provide a nutrient rich spermatophore during mating <sup>2,3,4</sup>. Thus  
27 the wing color morphs represent alternative life history strategies (ALHS) that are female-  
28 limited, wherein tradeoffs, due to divergent resource investment, result in distinct phenotypes  
29 with associated fitness consequences. Here we map the genetic basis of Alba in *Colias crocea*  
30 to a transposable element insertion downstream of the *Colias* homolog of *BarH-1*. To  
31 investigate the phenotypic effects of this insertion we use CRISPR/Cas9 to validate *BarH-1*'s  
32 functional role in the wing color switch and antibody staining to confirm expression differences in  
33 the scale building cells of pupal wings. We then use scanning electron microscopy to determine  
34 that *BarH-1* expression in the wings causes a reduction in pigment granules within wing scales,

35 and thereby gives rise to the white color. Finally, lipid and transcriptome analyses reveal  
36 additional physiological differences that arise due to Alba, suggesting pleiotropic effects beyond  
37 wing color. Together these findings provide the first well documented mechanism for a female  
38 ALHS and support an alternative view of color polymorphism as indicative of pleiotropic effects  
39 with life history consequences.

40

41 Evolutionary theory predicts that positive selection will remove variation from natural  
42 populations, as genotypes with the highest fitness go to fixation<sup>5</sup>. However, across diverse taxa  
43 ALHS are maintained within populations at intermediate frequencies due to balancing selection  
44<sup>6</sup>. Modelling and mechanistic insights have advanced our understanding of ALHS evolution and  
45 maintenance (e.g. negative - frequency dependent selection)<sup>7</sup>. However, the majority of  
46 studies, and consequently our insights, are biased toward male strategies that are  
47 morphologically dramatic (e.g. ruff<sup>8,9</sup> and side-blotched lizards<sup>10</sup>). Whether this bias reflects  
48 true differences in the frequency of alternative strategies between the sexes or is simply an  
49 artifact is unknown<sup>11</sup>. As trade-offs and selection regimes are often sex specific, the lack of  
50 female insights severely limits our understanding of the mechanisms, maintenance, evolution,  
51 and co-evolution of alternative strategies in general<sup>11</sup>. Yet despite calls for further investigation  
52<sup>11</sup>, a well documented mechanism for a female limited ALHS has yet to be identified. Here we  
53 identify one such mechanism in the butterfly *Colias crocea* (Pieridae).

54

55 Approximately a third of the nearly 90 species within the butterfly genus *Colias* exhibit a female-  
56 limited ALHS known as Alba<sup>12</sup>. The switch between strategies is controlled by a single,  
57 autosomal locus that causes Alba females to reallocate guanosine triphosphate (GTP),  
58 amounting to several percent of their nitrogen budget, from the synthesis of pteridine pigments  
59 to other areas of development<sup>1</sup>. Consequently, Alba females have white wings, while non-Alba  
60 females are orange/yellow (Fig. 1A). As a result of this trade-off, Alba females gain fitness  
61 advantages over orange females due to faster pupal development, a larger fat body, and  
62 significantly more mature eggs at eclosion<sup>2</sup>. Despite these developmental advantages and the  
63 dominance of the Alba allele, females remains polymorphic due to tradeoffs in abiotic and biotic  
64 factors<sup>2,13-15</sup>. For example, Alba's development rate advantage is higher only in cold  
65 temperatures, also as a result of density-dependent, interference competition with other white  
66 Pierid species and sexual selection, males preferentially mate with orange females<sup>2,3,13,14</sup>. The  
67 mating bias likely has significant fitness costs for Alba because males transfer essential  
68 nutrients during mating and multiply mated females have more offspring over their lifetime<sup>4,16</sup>.

69 Field studies confirm Alba frequency and fitness increases in species that inhabit cold and  
70 nutrient poor habitats, where the occurrence of other white Pierid butterflies is low, while in  
71 warm environments with nutrient rich host plants and a high co-occurrence with other white  
72 species, orange females exhibit increased fitness and frequency<sup>3,14</sup>.

73

74 Using a *de novo* reference genome for *C. crocea* that we generated via Illumina and PacBio  
75 sequencing (Extended Data Table 1), and three rounds of bulk segregant analyses (BSA) using  
76 whole genome sequencing of a female and two male informative crosses for Alba, we mapped  
77 the Alba locus to a ~3.7 Mbp region (Extended Data Fig.1, & Supplementary Information). Then,  
78 with whole genome re-sequencing data from 15 Alba and 15 orange females from diverse  
79 population backgrounds, a SNP association study was able to fine map the Alba locus to a  
80 single ~430 kb contig that fell within the ~3.7 Mbp BSA locus (Fig. 1B) (Supplementary  
81 Information). The majority of SNPs significantly associated with Alba (n=70 of 72) were within or  
82 flanking a *Jockey-like* transposable element (TE) (Fig. 1B & 1C). We determined the TE  
83 insertion is unique to the Alba morph in *C. crocea* by assembling the orange and Alba  
84 haplotypes for this region, then quantifying differences in read depth between morphs within and  
85 flanking the insertion, and comparing the region to other butterfly genomes (*Danaus plexippus* &  
86 *Heliconius melpomene*) (Extended Data Figs.2 & 3). Additionally we validated the presence and  
87 absence of the insertion, respectively, across 82 wild females, 25 Alba and 57 orange  
88 (Extended Data Fig.4).

89

90 The Alba specific TE insertion was located ~30 kb upstream of a *DEAD-box helicase*, and ~6kb  
91 downstream of *BarH-1*, a homeobox transcription factor (Fig. 1C). *BarH-1* was an intriguing find  
92 as its knockout in *Drosophila melanogaster* causes a dramatic decrease in pigment granules  
93 within the eye, changing eye color from red (wild type) to white<sup>17</sup>. To validate the functional role  
94 of *BarH-1* in the Alba phenotype we generated CRISPR/Cas9-mediated deletions of exons 1  
95 and 2 in a mosaic knockout approach (Extended Data Fig.5 & Supplementary Information).  
96 *BarH-1* deletions gave rise to a mosaic lack of pigmentation in the eyes of males and females of  
97 both morphs, consistent with *BarH-1*'s expected role in insect eye development (Fig. 1D).  
98 Additionally, on the dorsal side of the wings, females with an Alba genotype exhibited a  
99 white/orange color mosaic, while males and orange females displayed no wing KO phenotypes,  
100 despite those individuals exhibiting mosaic phenotypes in the eye. (Fig. 1E).

101

102 To further investigate the role of BarH-1 in developing wing scales, we used *in situ* hybridization  
103 of BarH-1 on wings from 2 day old pupae of orange and Alba females of *C. crocea*, as well as  
104 *Vanessa cardui*. The BarH-1 protein is highly expressed in the scale building cells of both  
105 species (Fig. 2), suggesting a previously undescribed role of BarH-1 in the developing wing  
106 scales of butterflies. Comparison between orange and Alba females of *C. crocea* further  
107 documents Alba as a gain of BarH-1 function, as scale building cells in the developing wing  
108 show a BarH-1 expression pattern that is Alba limited (Fig. 2).

109

110 In butterflies both pigments and scale morphology can affect wing color<sup>18</sup> and while Alba  
111 females exhibit large reductions in colored pteridine pigments compared to orange<sup>1</sup>, whether  
112 morphs differed in wing scale morphology was unknown. Using scanning electron microscopy  
113 we found Alba scales exhibited significantly less pigment granules, the structures that store  
114 pteridine pigments in Pierid butterflies<sup>19</sup>, compared to orange ( $t_{5.97} = 2.93$ ,  $p = 0.03$ ), suggesting  
115 reduced granule formation as the basis of the Alba color change (Fig. 3 A & B). As expected,  
116 the number of pigment granules were also significantly reduced in the white regions of the  
117 CRISPR/Cas9 *BarH-1* KO individuals ( $t_{5.45} = 10.78$ ,  $p < 0.001$ ) (Fig. 3C & D), demonstrating that  
118 *BarH-1* is affecting pigment granule formation to give rise to Alba. To further test whether  
119 reduction in pigment granule number alone was sufficient for the orange/white color change, we  
120 chemically removed the pigment granules from the wing of an orange *C. crocea* female,  
121 resulting in formerly orange regions turning white likely due to the scattering of light from  
122 remaining non-lamellar microstructures on the wing (Fig. 3 E)<sup>20</sup>. Thus, the white wings of Alba  
123 *C. crocea* (Fig. 1A & 3A) differ from other white Pierid species, as the latter exhibit abundant  
124 pigment granules in their scales (Fig. 3F and Extended Data Fig.6), documenting that there are  
125 multiple routes to white wing color in Pieridae.

126

127 We next tested whether the physiological tradeoffs of Alba reported for New World species<sup>1,2</sup>,  
128 which were discussed in the introduction, were also seen in *C. crocea*, an Old World species, as  
129 shared tradeoffs would suggest the Alba mechanism is conserved genus wide. To compare  
130 abdominal lipid stores between morphs, we conducted high performance thin layer  
131 chromatography on 2 day old adult females reared under two temperature treatments (Hot:  
132 27°C vs. Cold: 15°C during pupal development). We found Alba females had larger abdominal  
133 lipid stores than orange in both temperature treatments, though the difference was only  
134 significant in the cold treatment (cold:  $n=32$ ,  $t_{29.12} = 3.42$ ,  $P = 0.002$ , hot:  $n=25$ ,  $t_{22.71} = 0.67$ ,  $P =$

135 0.51) (Fig. 4A), consistent with the known effects of temperature on Alba fitness in New World  
136 *Colias* species<sup>2</sup>.

137

138 We then conducted RNASeq on pupal wing and abdomen tissue, at the time of pteridine  
139 synthesis (i.e. when allocation tradeoffs are realized) to identify genes that exhibited differential  
140 expression between morphs (Fig. 4B,C, Supplementary Information). We found that *vitellogenin*  
141 1, which encodes an egg yolk precursor protein synthesized in the fat bodies of insects<sup>21</sup>, was  
142 significantly upregulated within Alba abdomen tissue (log fold change [log FC] of 4.8) (Fig. 4B).  
143 Additionally, consistent with previous reports of GTP reallocation in Alba females<sup>1</sup>, *RIM*, a Rab  
144 GTPase effector<sup>22</sup>, was one of the most highly differentially expressed (DE) genes in both  
145 tissues (logFC increase in Alba of 3.4 in the abdomen and 5.1 in the wings) (Fig. 4B,C). *RIM*  
146 acts as a molecular switch by converting guanosine diphosphate to GTP, thereby activating its  
147 associated Rab GTPase, which is in turn involved in synaptic vesicle exocytosis and secretory  
148 pathways<sup>23</sup>. These results are consistent with previous qualitative findings of Alba females in  
149 the North American species *C. eurytheme* (Alba females have a larger fat body, emerge from  
150 the pupa with significantly more mature eggs, and reallocate GTP from pigment synthesis to  
151 somatic development<sup>1,2</sup>). Our findings thus quantitatively demonstrate that the trade-offs  
152 associated with the Alba ALHS are likely consistent across the *Colias* genus, suggesting that  
153 Alba may be due to the same genetic mechanism and corroborating previous work that  
154 proposed Alba is homologous across *Colias*<sup>12</sup>.

155

156 Gene set enrichment analyses identified 85 functional categories that were significantly  
157 enriched in the abdomen tissue of Alba females (Extended Data Fig.7), notably downregulation  
158 of 'positive regulation of GTPase activity' (adjusted p value < 0.0001), 'regulation of Notch  
159 signalling pathway' (adjusted p value = 0.03), and 'canonical Wnt signalling' (adjusted p value <  
160 0.01). While the Wnt pathway is known to regulate wing patterns in several butterfly species  
161<sup>24,25</sup>, these findings are curious as they are observed in abdomen tissue rather than wing,  
162 suggesting potential unexplored pleiotropic effects of these pathways outside of the wing. In  
163 wing tissue, 35 functional categories were significantly enriched and downregulated in Alba  
164 including 'regulation of transcription' (adjusted p value < 0.0001) and 'positive regulation of  
165 GTPase activity' (adjusted p value < 0.0001), while 'protein catabolic process' (adjusted p value  
166 < 0.0001) was upregulated (Supplementary Information). *BarH-1* was not DE between morphs  
167 in our RNASeq data, suggesting that morph specific expression differences are temporal and

168 likely occur earlier in development. Further functional studies of candidate genes are needed to  
169 better understand their mechanistic roles in the trade-off.

170

171 Here we report that the genetic basis of a female-limited ALHS arises from the co-option of the  
172 homeobox transcription factor *BarH-1*, primarily known for its role in the morphogenesis of the  
173 insect eye, neurons and leg segments <sup>26</sup>. We document that *BarH-1* has a similar function in  
174 eye morphogenesis of butterflies, and also find it is expressed during wing scale development in  
175 butterflies from the families Pieridae and Nymphalidae, which last shared a common ancestor  
176 over 70 million years ago. This novel finding suggests a conserved function of *BarH-1* in scale  
177 morphogenesis that warrants further study and suggests a parsimonious route to *BarH-1*'s gain  
178 of function in the ALHS Alba phenotype, with co-option from a role in wing scale development  
179 rather than its previously described functions. *BarH-1*'s well characterized role in determining  
180 cell fate through gene repression <sup>27</sup> suggests it is involved in the repression of pigment granule  
181 formation, providing an explanation for the Alba allele being dominant and a gain of function that  
182 results in the absence of a phenotype (i.e. orange wing color). To what extent *BarH-1* has an  
183 active pleiotropic role in other tissues or developmental stages remains to be determined, as the  
184 extensive physiological responses we document could easily arise from a simple reallocation  
185 following the absence of pigment granule formation. Given the emergence of "toolkit" genes for  
186 butterfly wing patterning, wherein specific genes have been found to be repeatedly involved in  
187 wing color variation across distant species (e.g. *cortex* <sup>28</sup>), determining to what extent *BarH-1* is  
188 involved in other wing phenotypes and ALHS is of interest, especially given the pleiotropic  
189 effects on life history documented here. Finally, our results and others (e.g. side-blotched lizards  
190 <sup>29</sup> & damselflies <sup>30</sup>) suggest that investigating to what extent ALHS are associated with color  
191 variation in other systems is warranted, especially in cases where such variation is female  
192 limited.

193

#### 194 **Author Contributions**

195 AW conducted butterfly rearings and lab work, analysed the data, and wrote the manuscript with  
196 CWW and input from the coauthors. MWP, KT, CWW, and AW conducted the CRISPR/Cas9  
197 knockout experiment. AW and KT conducted the electron microscopy. MWP conducted  
198 antibody staining. RN and JH assisted with bioinformatics. PL and RK conducted HPTLC and  
199 PL and AW analyzed the data. AW, CS, CWW and OB conducted fieldwork. MC conducted lab  
200 work. CWW supervised the work at all stages.

201

202 **Acknowledgements**

203 We would like to thank Lovisa Wennerström, Elishia Harji, Jofre Carnicer, and Christina Hansen  
204 Wheat for help with fieldwork. We thank Marianne Ahlbom for assistance with the SEM. Finally  
205 we would like to thank Christen Bossu, Naomi Keehnen, and Peter Pruisscher for helpful  
206 comments on the manuscript. We thank the Department of Zoology at Stockholm University, the  
207 Swedish Research Council 2012–3715, the Academy of Finland 131155, the Knut and Alice  
208 Wallenberg Foundation 2012.0058 and the Erik Philip-Sörensens foundation for funding.

209  
210 **References**

- 211 1. Watt, W.B. Adaptive significance of pigment polymorphisms in *Colias* butterflies. III.  
212 Progress in the study of the “alba” variant. *Evolution* **27**: 537–548 (1973).
- 213 2. Graham, S.M.S., Watt, W.B., & Gall, L.F.L. Metabolic resource allocation vs. mating  
214 attractiveness: Adaptive pressures on the “alba” polymorphism of *Colias* butterflies. *Proc*  
215 *Natl Acad Sci U S A* **77**: 3615–3619 (1980).
- 216 3. Nielsen, M.G. & Watt, W.B. Interference competition and sexual selection promote  
217 polymorphism in *Colias* (Lepidoptera, Pieridae). *Functional Ecology* **14**: 718–730 (2000).
- 218 4. Boggs, C.L. & Watt, W.B. Population structure of pierid butterflies IV. Genetic and  
219 physiological investment in offspring by male *Colias*. *Oecologia* **50**: 320–324 (1981).
- 220 5. Fisher, R.A. *The Genetical Theory of Natural Selection*. Oxford University Press (1930).
- 221 6. Gross, M.R. Alternative reproductive strategies and tactics: diversity within sexes.  
222 *Trends Ecol Evol.* **11**: 92-98 (1996).
- 223 7. Hofbauer, J. & Sigmund, K. *Evolutionary Game Dynamics*. *Bulletin of the American*  
224 *Mathematical Society* **40**: 479–519 (2003).
- 225 8. Lamichhaney, S. *et al.* Structural genomic changes underlie alternative reproductive  
226 strategies in the ruff (*Philomachus pugnax*). *Nat Genet* **48**: 84–88 (2015).
- 227 9. Lank, D.B., Smith, C.M., Hanotte, O., Burke, T. & Cooke, F. Genetic polymorphism for  
228 alternative mating-behavior in lekking male ruff *Philomachus pugnax*. *Nature* **378**: 59–62  
229 (2015).
- 230 10. Sinervo, B., & Lively, C. M. The rock-paper-scissors game and the evolution of  
231 alternative male reproductive strategies. *Nature* **380**: 240–243 (1996).
- 232 11. Alonzo SH, Oliveira RF, Taborsky M, & Brockmann HJ. Conflict between the sexes and  
233 alternative reproductive tactics within a sex, *Alternative reproductive tactics: an*  
234 *integrative approach*, 2008 Cambridge (UK) Cambridge University Press (pg. 435-450).

- 235 12. Limeri, L.B. & Morehouse, N.I. The evolutionary history of the “alba” polymorphism in the  
236 butterfly subfamily Coliadinae (Lepidoptera: Pieridae). *Biological Journal of the Linnean*  
237 *Society* **117**: 716–724 (2015).
- 238 13. Woronik, A., Stefanescu, C., Käkälä, R., Wheat, C.W., & Lehmann, P. Physiological  
239 differences between female limited, alternative life history strategies: The Alba  
240 phenotype in the butterfly *Colias croceus*. *Journal of Insect Physiology* **107**: 257-264  
241 (2018).
- 242 14. Nielsen, M.G. & Watt, W.B. Behavioural fitness component effects of the alba  
243 polymorphism of *Colias* (Lepidoptera, Pieridae): resource and time budget analysis.  
244 *Functional Ecol* **12**: 149–158 (1998).
- 245 15. Hovanitz, W. The Biology of *Colias* Butterflies. I. The Distribution of the North American  
246 Species. *The Wasmann Journal of Biology* **8**: 1–28 (1950).
- 247 16. Wiklund, C., Karlsson, B., Leimar, B. Sexual conflict and cooperation in butterfly  
248 reproduction: a comparative study of polyandry and female fitness. *Proc. R. Soc. B* **268**  
249 1661-1667 (2001).
- 250 17. Higashijima, S., Kojima, T., & Michiue, T. Dual *Bar* homeo box genes of *Drosophila*  
251 required in two photoreceptor cells, R1 and R6, and primary pigment cells for normal eye  
252 development. *Genes & Development* **6**: 50–60 (1992).
- 253 18. Nijhout, H.F. The Development and Evolution of Butterfly Wing Patterns. Smithsonian  
254 Institution Press (1991).
- 255 19. Morehouse, N.I., Vukusic, P., & Rutowski, R. Pterin pigment granules are responsible for  
256 both broadband light scattering and wavelength selective absorption in the wing scales  
257 of pierid butterflies. *Proc. R. Soc. B* **274**: 359–366 (2007).
- 258 20. Rutowski, R.L., Macedonia, J.M., Morehouse, N., & Taylor-Taft, L. Pterin pigments  
259 amplify iridescent ultraviolet signal in males of the orange sulphur butterfly, *Colias*  
260 *eurytheme*. *Proc. R. Soc. B* **272**: 2329–2335 (2005).
- 261 21. Hagedorn, H.H. & Kunkel, J.G. Vitellogenin and Vitellin in Insects. *Annu. Rev. Entomol.*  
262 **24**: 475–505 (1979).
- 263 22. Pavlos, N.J. & Jahn, R. Distinct yet overlapping roles of Rab GTPases on synaptic  
264 vesicles. *Small GTPases* **2**: 77–81 (2011).
- 265 23. Stenmark, H. Rab GTPases as coordinators of vesicle traffic. *Nat Rev Mol Cell Biol* **10**:  
266 513–525 (2009).
- 267 24. Gallant, J.R. *et al.* Ancient homology underlies adaptive mimetic diversity across  
268 butterflies. *Nature Communications* **5**:4817 (2014).



- 269 25. Martin, A. *et al.* Diversification of complex butterfly wing patterns by repeated regulatory  
270 evolution of a Wnt ligand. *Proc Natl Acad Sci* **109**: 12632-12637 (2012).
- 271 26. Reig G., Cabrejos, M.E., & Concha. M.L. Functions of BarH transcription factors during  
272 embryonic development. *Dev Biol* **302**: 367-375 (2007).
- 273 27. Kang, J., Yeom, E., Lim, J., & Choi, K. Bar Represses dPax2 and Decapentaplegic to  
274 Regulate Cell Fate and Morphogenetic Cell Death in *Drosophila* Eye. *Plos One* **9**:  
275 e88171 (2014).
- 276 28. Nadeau, N.J. *et al.* The gene *cortex* controls mimicry and crypsis in butterflies and  
277 moths. *Nature* **534**: 106-110 (2016).
- 278 29. Sinervo, B., Svensson, E., & Comendant, T. Density cycles and an offspring quantity  
279 and quality game driven by natural selection. *Nature* **406**: 985–988 (2000).
- 280 30. Sánchez-Guillén, R.A. *et al.* Alternative reproductive strategies and the maintenance of  
281 female color polymorphism in damselflies. *Ecol Evol* **7**: 5592-5602 (2017).

## 282 **Methods**

283 For detailed methods, including all bioinformatic commands, please see the supplementary  
284 information.

285 **Data availability:** SRA reference numbers for the genome and sequencing data will be included  
286 upon acceptance.

287 **Genome assembly:** An orange female and male carrying Alba (offspring from wild caught  
288 butterflies, Catalonia, Spain) were mated in the lab. DNA from an Alba female offspring of this  
289 cross was extracted. Quality and quantity were assessed using a Nanodrop 8000  
290 spectrophotometer (Thermo Scientific) and a Qubit 2.0 fluorometer (dsDNA BR, Invitrogen). A  
291 180 insert size paired end library (101bp reads) was prepared (TruSeq PCR free) and  
292 sequenced on an Illumina HiSeq 4000 at the Beijing Genomics Institute (Shenzhen, China). A  
293 Nextera mate-pair library with a 3 kb insert size was prepared and sequenced on an Illumina  
294 HiSeq 2500 (125bp reads) at the Science for Life Laboratory (Stockholm, Sweden). Raw data  
295 was cleaned and high quality reads were used as input for the AllPaths-LG (v. 50960)<sup>31</sup>  
296 assembly pipeline. High molecular weight DNA was extracted from two more Alba females from  
297 the above mentioned cross (i.e full siblings). Equal amounts of DNA from each individual were  
298 pooled sent to the Science for Life Laboratory (Stockholm, Sweden) for PacBio sequencing on  
299 24 SMRT cells (~17GB of data was produced). A Falcon (v. 0.4.2)<sup>32</sup> assembly was generated  
300 by the Science for Life Laboratory. We then used Metassembler (v. 1.5)<sup>33</sup> to merge our  
301 AllPathsLG and Falcon assemblies, using the AllPathsLG assembly as the primary assembly.

302 **Bulk segregant analyses (BSA):** The female informative cross data and mapping protocol  
303 described in Woronik and Wheat, 2017<sup>34</sup> was applied to the high quality reference genome to  
304 identify the contigs that made up the Alba chromosome. **Male Informative Cross (MIC) I:** DNA  
305 was extracted from a wild caught orange mother (Catalonia Spain) and 26 of her Alba and 24 of  
306 her orange female offspring. DNA quality and quantity of each individual was assessed via a  
307 Nanodrop 8000 spectrophotometer (Thermo Scientific, MA, USA) and a Qubit 2.0 Fluorometer  
308 (dsDNA BR; Invitrogen, Carlsbad, CA, USA) before pooling equal amounts of high-quality DNA

309 from Alba and orange offspring into two pools, respectively. The library preparation (TruSeq  
310 PCR-free) and Illumina sequencing (101 bp PE HiSeq2500), was performed at the Beijing  
311 Genomics Institute (Shenzhen, China). Raw reads were cleaned and then mapped to the  
312 reference genome using NextGenMap v0.4.10 (-i 0.09)<sup>35</sup>. SAMTOOLS v1.2<sup>36</sup> was used to filter  
313 (view -f 3 -q 20), sort and index the bam files and generate mpileup files for the two pools and  
314 the orange mother. Popoolation2<sup>37</sup> were used to calculate the allele frequency difference  
315 between Alba and orange pools. SNP sites were filtered in R<sup>38</sup>, for a read depth  $\geq 30$  and  $\leq$   
316 300, a bi-allelic state, and a minimum minor allele frequency of 3. The orange mother mpileup  
317 was similarly analyzed using Popoolation<sup>39</sup> (read depth  $\geq 5$  and  $\leq 30$ ); but the major and minor  
318 allele frequencies were calculated in R<sup>38</sup> by dividing the major and minor allele count by the  
319 read depth at each site respectively. A SNP site was considered a MIC I Alba SNP when it met  
320 the following expectations: 1) homozygous in the orange mother, 2) homozygous in the orange  
321 pool, 3) the allele frequency difference in the Alba pool compared to the orange was 0.45-0.55.  
322 **MIC II:** A male carrying Alba mated an orange female in the lab at Stockholm University. DNA  
323 was prepared as described above for 26 Alba and 28 orange female offspring resulting in two  
324 DNA pools. Library preparation (TruSeq PCR-free) and Illumina sequencing (150 bp paired-end  
325 reads with 350bp insert, HiSeqX), was performed at Science for Life Laboratory (Stockholm,  
326 Sweden). The same mapping and SNP calling pipeline used on the MIC I was applied. A site  
327 was considered an Alba SNP if 1) it was homozygous in the orange pool and 2) the allele  
328 frequency difference in the Alba pool compared to the orange was 0.45-0.55. A contig was  
329 considered Alba associated if it had  $\geq 3$  Alba SNPs in all crosses. Nineteen Alba associated  
330 contig were identified. They total  $\sim 3.7$ Mbp and are considered the Alba BSA locus.

331 **Genome wide association study:** DNA for genome re-sequencing was extracted from 15 Alba  
332 and 15 orange females from diverse population backgrounds (Catalonia, Spain and Capri, Italy).  
333 High quality DNA was prepared using Illumina TruSeq and sequenced at the Science for Life  
334 Laboratory (Stockholm, Sweden) (150 bp paired-end reads HiSeqX). Cleaned reads were  
335 mapped to the annotated reference genome using NextGenMap v0.4.10 (-i 0.6 -X 2000)<sup>35</sup>. Bam  
336 files were filtered and sorted using SAMTOOLS v1.2 (view -f 3 -q 20)<sup>36</sup>. A VCF file was  
337 generated using SAMTOOLS v1.2 (-t DP -t SP -Q 15)<sup>36</sup> and bcftools v.1.2 (-Ov -m)<sup>36</sup>. VCFtools  
338 (v0.1.13)<sup>40</sup> was used to call SNP sites with no more than 50% missing data, an average read  
339 depth between 15-50 across individuals, and a minimum SNP quality of 30. An association  
340 analysis was performed with PLINK (v1.07)<sup>41</sup> and a Benjamini & Hochberg step-up FDR control  
341 was applied. SNPs with FDR  $< 0.05$  were considered Alba SNPs. We conducted this analysis  
342 both genome wide and only within the BSA locus. Both analyses fine mapped the Alba locus to  
343 the same genomic region.

344 **Antibody Generation and Staining:** A Rabbit-anti-Bar antibody was generated against the full  
345 length sequence of the *Vanessa cardui* Bar homolog:  
346 MTVQRDERDARAPRTRFMITDILDAAPRDLSAHRSDSDRSATDSPGVKDDSDDVSSKSCGG  
347 DASGLAKKQRKARTAFTDHQLQTLEKSFERQKYLVSQDRMELAAKLGLTDTQVKTWYQNRRT  
348 KWKRQTAVGLELLAEAGNYAAFQRLYGGYWAGVPAYPAQPAPAAADLYRQAAATAAAAASA  
349 SANTLQKPLPYRLYPGAPLGGVPPLGLGLPGPSAHLGSLGAPGLGALGYAQAARRTPSPDVPD  
350 GSPAPPPRSPREPSIEQRSDDDEDDDETIHV. Protein was generated by GenScript (Piscataway,  
351 NJ) and purified to  $> 80\%$  purity. DNA sequences to produce this protein were codon-optimized

352 for bacterial expression and made via gene synthesis. GenScript injected resultant protein into  
353 host animals, collected serum for testing, and affinity purified the product using additional target  
354 protein bound to a column. Antibody staining was performed as described previously for  
355 *Drosophila* and butterfly tissues<sup>42</sup>. Staged pupal wings and retinas were dissected and fixed  
356 between 24-72 hours post-pupation. The Rabbit-anti-Bar antibody was used at 1:100, followed  
357 by secondary antibody staining with AlexFluor-555-anti-Rabbit secondaries at 1:500 and  
358 counterstaining with DAPI. Images were captured using standard confocal microscopy on a  
359 Leica SP5.

360 **CRISPR/Cas9 knockouts:** The guide-RNA (gRNA) sequences were generated using the  
361 protocol described in Perry et al. 2016. Viable Cas9 target-sites were located by manually  
362 looking for PAM-sites (NGG) in the exon region of *BarH-1*. Uniqueness of the target regions was  
363 confirmed using a NCBI nucleotide blast (ver. 2.5.0+ using blastn-short flag and filtering for an  
364 e-value of 0.01) against the *C. crocea* reference genome. gRNA constructs were ordered from  
365 Integrative DNA Technologies (Coralville, Iowa, USA) as DNA (gBlocks). Full gRNA constructs  
366 had the following configuration: an M13F region, a spacer sequence, a T7-promotor sequence,  
367 the Target specific sequence, a Cas9 binding sequence, and finally a P505 sequence. Upon  
368 delivery, gBlocks were amplified using PCR to generate single-stranded guide RNA (sgRNA).  
369 For each gBlock, four 50ul reactions were conducted using the M13f and P505 primers and  
370 Platinum Taq (Invitrogen cat. 10966-034). The four reactions were then combined and purified  
371 in a Qiagen Minelute spin column (cat. 28004, Venlo, Netherlands). The resulting template was  
372 transcribed using the Lucigen AmpliScribe T7-flash Transcription Kit from Epicentre/Illumina  
373 (cat. ASF3507, Madison, WI, USA) followed by purification via ammonium acetate precipitation.  
374 Products were resuspended with Qiagen buffer EB, concentrations were quantified by Qubit and  
375 further diluted to 1000 ng/μl. They were then mixed with Cas9-NLS protein (PNA Bio, Newbury  
376 Park, CA, USA) and diluted to a final concentration of 125-250 ng/μl. *C. crocea* females (n > 40)  
377 from Aiguamolls de l'Empordà, Spain were captured and kept in morph-specific flight cages in  
378 the lab at Stockholm University where they oviposited on alfalfa (*Medicago sativa*). Eggs were  
379 collected between 1-7h post-laying and sterilized in 7% benzalkonium chloride for ~5 minutes  
380 before injection. Injections were either at a concentration of 125 or 250 ng/ul and conducted  
381 using a M-152 Narishige micromanipulator (Narishige International Limited, London, UK) with a  
382 50 ml glass needle syringe, with injection pressure applied by hand via a syringe fitting.

383 **CRISPR/Cas9 validation:** To validate the mutation, Cas9 cut sites were PCR-amplified and a  
384 ~370bp region, centered on the intended cut site were sequenced using Illumina MiSeq 300bp  
385 paired-end sequencing. Primers were designed using Primer3  
386 ([http://biotools.umassmed.edu/bioapps/primer3\\_www.cgi](http://biotools.umassmed.edu/bioapps/primer3_www.cgi)). DNA was isolated from KO-  
387 individuals using KingFisher Cell and Tissue DNA Kit from ThermoFisher Scientific (N11997)  
388 and the robotic Kingfisher Duo Prime purification system. DNA quality and quantity were  
389 assessed via a Nanodrop 8000 spectrophotometer (Thermo Scientific, MA, USA) and a Qubit  
390 2.0 Fluorometer (dsDNA BR; Invitrogen, Carlsbad, CA, USA). Aliquots were then taken and  
391 diluted to 1ng/ul before amplifying the region over the cleavage-site. Sequences were amplified  
392 and ligated with Illumina adapter and indexes in a two-step process following the protocol  
393 provided by Science for Life Laboratories (Stockholm, Sweden) and Illumina. First, we amplified  
394 the ~370bp long sequence around the cut sites and attach the first Illumina adapter, onto which  
395 we later attach Illumina handles and Index using a second round of PCR (Accustart II PCR

396 Supermix from Quanta Bio [Beverly, MA, USA], settings 94C x 2 min followed by 40 cycles of 94  
397 C x 30 sec + 60 C x 15 sec + 68 C x 1 min followed by 68 C x 5 min). PCR products were  
398 purified using Qiagen Qiaquick (Cat. 28104). Concentration and quality of the product were  
399 assessed via Nanodrop and gel electrophoresis. DNA was diluted to ~0.5ng/ul and then the  
400 unique double indices were attached by the second round of PCR (same protocol as above).  
401 The final PCR products were purified again using Qiaquick spin columns and concentration and  
402 size was assessed using Qubit fluorometer and gel electrophoresis. All samples were then  
403 mixed at equal molarity and sent for sequencing at Science for Life Laboratories (Stockholm,  
404 Sweden). Sequences were aligned to their respective fragments (area surrounding cut site)  
405 using SNAP (ver. 1.0beta18) <sup>43</sup>, identical reads were clustered using the collapser utility in  
406 Fastx-Toolkit. Sequences containing deletions were extracted and the most abundant  
407 sequences containing deletions were selected for confirmation of deletion in the expected  
408 region.

409 **Electron Microscopy:** To quantify pigment granule differences between Alba and orange  
410 individuals pieces of the forewing were mounted on aluminum pin stubs (6mm length) with the  
411 dorsal side upwards. Samples were coated in gold for 80 seconds using an Agar sputter coater  
412 and imaged under 5 kV acceleration voltage, high vacuum, and ETD detection using a scanning  
413 electron microscope (Quanta Feg 650, FEI, Hillsboro, Oregon, USA). To quantify pigment  
414 granules within the photos we selected images from the same magnification and drew randomly  
415 placed three 4  $\mu\text{m}^2$  squares on the images. We counted the number of pigment granules within  
416 each square and took the average, then conducted a two sample t-test in R. To quantify  
417 pigment granule differences between KO and wild type regions in our CRISPR KO mosaic  
418 individuals, a biopsy hole punch a 2mm in diameter circle was used to cut out one piece mostly  
419 containing white scales and one piece with mostly orange scales. These pieces were first  
420 photographed using a Leica EZ4HD stereo microscope in order to allow us to confirm the color  
421 of each scale once they were covered with gold sputter. Five white and five orange scales were  
422 then selected and the granules from a 4 $\mu\text{m}^2$  square were counted from each of those scales  
423 and a two sample t-test was then conducted in R.

424 **Lipid Analysis:** Wild caught *C. crocea* Alba females (Catalonia, Spain) oviposited in the lab.  
425 Eggs were moved into individual rearing cups and split between two temperature treatments  
426 (hot: 27 °C and 16 hour day length during larval and pupal development, cold: reared at 22 °C  
427 with a 16 hour day length during larval development and 15 °C with a 16 hour day length during  
428 pupal development). Once pupated individuals were checked a minimum of every 12 hours.  
429 Upon eclosion adults were stored at 4 °C until the next day to provide time for meconium  
430 excretion. Butterflies were not allowed to feed before dissection. Body weight was taken using a  
431 Sauter RE1614 scale before dissection. Total lipids were extracted using the Folch method <sup>44</sup>  
432 according to the procedures outlined in Woronik et. al. 2018 <sup>13</sup>. HPTLC was conducted as  
433 described in Woronik et. al. 2018 <sup>13</sup>. In brief, 5  $\mu\text{l}$  of the sample lipid extract was applied on a  
434 silica plate with a Camag Automatic TLC Sampler 4 (Camag, Muttenz, Switzerland). After the  
435 silica plate developed it was scanned with a Camag TLC plate scanner 3 at 254 nm using a  
436 deuterium lamp with a slit dimension of 6 × 0.45 mm and analyzed with the Win-CATS 1.1.3.0  
437 software. Peaks representing the four major neutral lipid classes (diacylglycerols,  
438 triacylglycerols, cholesterol and cholesterol esters) were identified by comparing their retention  
439 times against known standards. Then the peak areas were integrated and the amount of lipid

440 within each class was calculated using the formula:  $\text{pmol}_{\text{sample}} = (\text{Area}_{\text{sample}} / \text{Area}_{\text{standard}}) \times$   
441  $\text{pmol}_{\text{standard}}$ . The total lipid content (nmol per abdomen) was calculated as a sum of pmol  
442 contents of all neutral lipid classes. For the statistical analyses this value was regressed against  
443 abdomen weight and standardized residuals (i.e. mass-corrected storage lipid amount) and  
444 were subsequently used as dependent variable.

445 **Transcriptome assembly and differential expression analysis:** Offspring from a wild caught  
446 Alba female from Catalonia, Spain were reared at Stockholm University. When larvae reached  
447 the fifth instar they were checked at least every six hours and the pupation time of each  
448 individual was recorded. Tissue was collected between 82% and 92% of pupal development.  
449 Pupae were dissected in PBS solution, and the abdomen and wings were flash frozen in liquid  
450 nitrogen and stored at -80 °C. RNA was extracted from the abdomen and wing tissues using  
451 Trizol. RNA quality and quantity was assessed using a Nanodrop 8000 spectrophotometer  
452 (Thermo Scientific) and an Experion electrophoresis machine using the manufacturer protocol  
453 (Bio-Rad, Hercules, CA). Library preparation (Strand-specific TruSeq RNA libraries using poly-A  
454 selection) and sequencing (101 bp PE HiSeq2500 - high output mode) was performed at the  
455 Science for Life Laboratories (Stockholm, Sweden). In total 16 libraries were sequenced (4  
456 orange and 4 Alba individuals - wings and abdomen from each individual). Raw data was  
457 cleaned and reads from all libraries were used in a *de novo* transcriptome assembly (Trinity  
458 version trinityrnaseq\_r2013\_08\_14 with default parameters)<sup>45</sup>. To reduce the redundancy  
459 among contigs and produce a biologically valid transcript set, the tr2aacds pipeline from the  
460 EvidentialGene software package<sup>46</sup> was run on the raw Trinity assembly. The sixteen RNA-Seq  
461 libraries were mapped to the resulting transcriptome using NextGenMap v0.4.10 (-i 0.09)<sup>35</sup>.  
462 SAMTOOLS v1.2<sup>35</sup> was then used to filter (view -f 3 -q 20), sort and index the sixteen bam files.  
463 SAMTOOLS v1.2<sup>35</sup> idxstats was then used to calculate the read counts per gene for each of the  
464 sorted bam files. These counts were then joined in a CSV file using an in-house pipeline and  
465 csvjoin. A differential expression analysis was conducted in EdgeR<sup>47</sup>. A Benjamini Hochberg  
466 correction was applied to the raw p values to correct for false discovery rate and differentially  
467 expressed genes were called (adjusted p value <0.05). Babelomics (version 4.2)<sup>48</sup> was used to  
468 conduct a gene set enrichment analysis (Fatiscan, two tailed Fisher's exact test). Revigo<sup>49</sup> was  
469 used to cluster significantly enriched GO terms by semantic similarity (default settings, C = 0.7).  
470 The GO term clusters were named and assigned p-values based on the most significant GO  
471 term in the cluster.

472  
473

474 31. Gnerre, S. *et al.* High-quality draft assemblies of mammalian genomes from  
475 massively parallel sequence data. *Proc Natl Acad Sci* **108**:1513-1518 (2011).

476  
477 32. Chin, C. *et al.* Phased diploid genome assembly with single-molecule real-time  
478 sequencing. *Nature Methods* **13**: 1050–1054 (2016).

479  
480 33. Wences, A.H. & Schatz M.C. Metassembler: merging and optimizing *de novo*  
481 genome assemblies. *Genome Biology* **16**: 207 (2015).

482 34. Woronik, A. & Wheat, C.W. Advances in finding Alba: the locus affecting life history  
483 and color polymorphism in a *Colias* butterfly. *Journal of Evolutionary Biology* **30**: 26-39

- 484 (2017).
- 485 35. Sedlazeck, F.J., Rescheneder, P. & Haeseler, von, A. NextGenMap: fast and  
486 accurate read mapping in highly polymorphic genomes. *J Gerontol* **29**: 2790–2791  
487 (2013).
- 488 36. Li, H. *et al.* The Sequence Alignment/Map format and SAMtools. *Bioinformatics* **25**:  
489 2078–2079 (2009)
- 490 37. Kofler, R., Pandey, R.V. & Schlotterer, C. PoPoolation2: identifying differentiation  
491 between populations using sequencing of pooled DNA samples (Pool-Seq).  
492 *Bioinformatics* **27**: 3435–3436 (2011b).
- 493 38. R Core Team (2015). R: A language and environment for statistical computing. R  
494 Foundation for Statistical Computing, Vienna, Austria. URL <https://www.R-project.org/>.
- 495 39. Kofler, R. *et al.* PoPoolation: A Toolbox for Population Genetic Analysis of Next  
496 Generation Sequencing Data from Pooled Individuals. *PLoS ONE* **6**: e15925 (2011a).
- 497 40. Danecek, P. *et al.* The variant call format and VCFtools. *Bioinformatics* **27**: 2156–  
498 2158 (2011).
- 499 41. Purcell, S. *et al.* PLINK: A Tool Set for Whole-Genome Association and Population-  
500 Based Linkage Analyses. *The American Journal of Human Genetics* **81**: 559–575  
501 (2007).
- 502 42. Perry, M.W. *et al.* Molecular logic behind the three-way stochastic choices that  
503 expand butterfly colour vision *Nature*: **535**:280–284 (2016).
- 504 43. Zaharia, M. *et al.* Faster and More Accurate Sequence Alignment with SNAP.  
505 ArXiv:1111.5572 [Cs, q-Bio], November. <http://arxiv.org/abs/1111.5572> (2011).
- 506 44. Folch, J.M., Lees, M., & Sloane-Stanley, G.H. A simple method for the isolation and  
507 purification of total lipides from animal tissue. *J. Biol. Chem.* **226**: 497-509 (1957).
- 508 45. Grabherr, M.G. *et al.* Full-length transcriptome assembly from RNA-Seq data without  
509 a reference genome. *Nat Biotechnol* **29**: 644–652 (2011).
- 510 46. Gilbert, Donald (2013) Gene-omes built from mRNA seq not genome DNA. 7th  
511 annual  
512 arthropod Genomics symposium. Notre Dame.  
513 <http://arthropods.eugenes.org/EvidentialGene/about/EvigeneRNA2013poster.pdf> and  
514 <http://globalhealth.nd.edu/7th-annual-arthropod-genomics-symposium/>  
515
- 516 47. Robinson, M.D., McCarthy, D.J. & Smyth, G.K. edgeR: a Bioconductor package for  
517 differential expression analysis of digital gene expression data. *Bioinformatics* **26**: 139–  
518 140 (2009).
- 519 48. Medina, I. *et al.* Babelomics: an integrative platform for the analysis of  
520 transcriptomics, proteomics and genomic data with advanced functional profiling. *Nucleic*

521 *Acids Research* **38**: W210–W213 (2010).

522 49. Supek, F., Bošnjak, M., Škunca, N. & Šmuc, T. REVIGO Summarizes and Visualizes  
523 Long Lists of Gene Ontology Terms. *PLoS ONE* **6**: e21800 (2011).

524

525

526

**Figure 1. Color variation in *Colias crocea* and the genetic mechanism of Alba.** (A) *Colias crocea* male, orange female, and Alba female (left to right). (B) SNPs significantly associated with the Alba phenotype (red) within the ~3.7 Mbp Alba locus identified via 3 rounds of bulk segregant analysis. Contigs in this region shown as alternating dark and light blue. (C) The location of Alba associated SNPs (red) on the ~430 kb outlier contig identified in the GWAS. Gene models for the DEAD-box helicase, the Jockey-like transposable element, and *BarH-1* shown at the top of the panel. (D) Loss of green color in the *C. crocea* eye following *BarH-1* mosaic KO. KO regions are black. (E) Orange color is seen on the dorsal forewing (upper) and hindwing (lower) of an Alba female following *BarH-1* mosaic KO.

**Figure 2. BarH-1 antibody staining in *Colias crocea* and *Vanessa cardui* pupal wings.** (A) Depiction of approximate location of antibody images on the *C. crocea* Alba forewing and the scales within the region. (B) DAPI (nuclei) and BarH-1 staining within the scale building cells within the black margin region of the Alba forewing. BarH-1 is expressed in melanic Alba scale building cells. (C) DAPI (nuclei) and BarH-1 staining of white regions of the Alba forewing. Large nuclei are scale building cells while small nuclei are epithelial cells. Antibody staining shows BarH-1 expression in the white Alba scale building cells. (D) Depiction of approximate location of antibody images on the *C. crocea* orange forewing and the scales within the region. (E) DAPI (nuclei) and BarH-1 staining of orange regions of the orange forewing. Large nuclei are scale building cells while small nuclei are epithelial cells. Antibody staining shows a lack of BarH-1 expression in the orange scale building cells. (F) Depiction of approximate location of antibody images on the *C. crocea* orange hindwing and an illustration of the scale heterogeneity found within the region. (G) DAPI (nuclei) and BarH-1 staining of the orange hindwing. Large nuclei are scale building cells while small nuclei are epithelial cells. Antibody staining shows heterogeneity in BarH-1 expression in the scale building cells within this region presumably corresponding to the variation in scale color, where melanic scale building cells express BarH-1, but orange do not. (H) Hind and fore wing of *V. cardui*. (I) DAPI (nuclei) and BarH-1 staining of *V. cardui*. Both the scale building and socket cells can be observed and express BarH-1.

**Figure 3. Butterfly forewings and scanning electron microscope (SEM) images of their wing scale microstructures.** (A) A WT Alba female wing and SEM of one of its wing scales, showing the near absence of pigment granules. (B) A WT orange female wing and SEM, showing an abundance of pigment granules. (C) An Alba female that is a *BarH-1* mosaic KO, SEM images illustrate significant differences in the number of pigment granules in Alba (C) and orange (D) mosaic regions. These differences are consistent with those observed in WT animals. (E) Dorsal forewing of an orange female where pigment granules were chemically removed from distal ½ of wing. SEM inset showing absence of pigments in the white region. (H) A *Pieris brassicae* female



forewing, with SEM showing abundance of pigment granules despite its white color, indicating there are multiple routes to white wing color within Pieridae.

**Figure 4. Physiological differences between female morphs.** A) The mass corrected total neutral lipid content for female morphs in two temperature treatments. Alba females, on average, have larger neutral lipid stores, however there is an interaction between morph and temperature as the difference is only significant in the cold treatment. Error bars are the standard error (cold:  $n=32$ ,  $t_{29.12} = 3.42$ ,  $P = 0.002$ , hot:  $n=25$ ,  $t_{22.71} = 0.67$ ,  $P = 0.51$ ). B) Volcano plot to visualize gene expression differences between female morphs in pupal abdominal tissue. Each point is a gene. Grey circles are genes not significantly DE between morphs, while blue circles are significantly DE. The black square is *vitellogenin1* and the black triangle is *RIM*. The X-axis is the log of the fold change (FC), positive log(FC) indicates the gene is upregulated in Alba individuals. C) Volcano plots visualize gene expression differences between female morphs in pupal wing tissue. Color coding, shapes, and axes are the same as above.

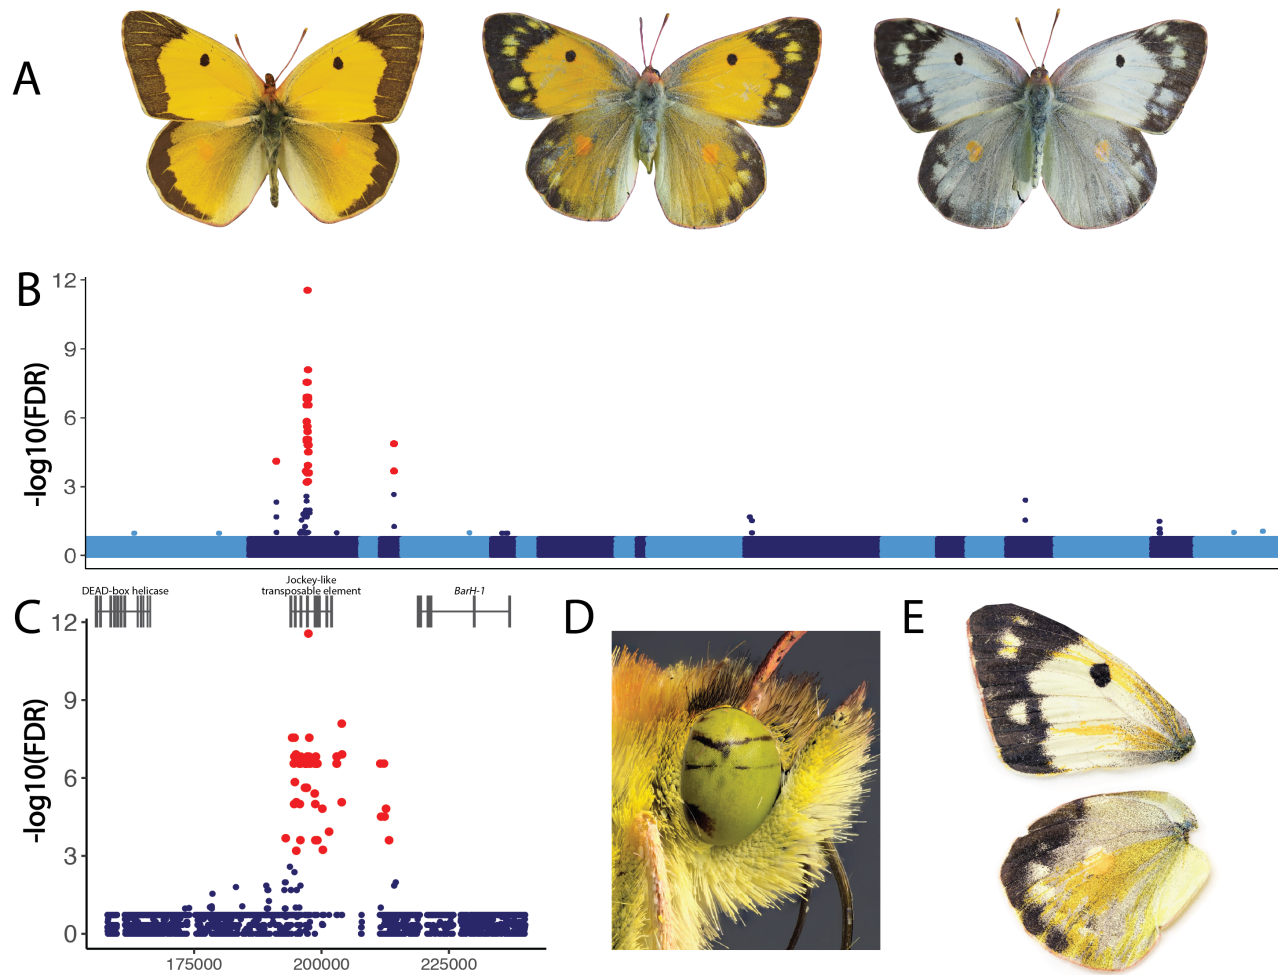

Figure 1

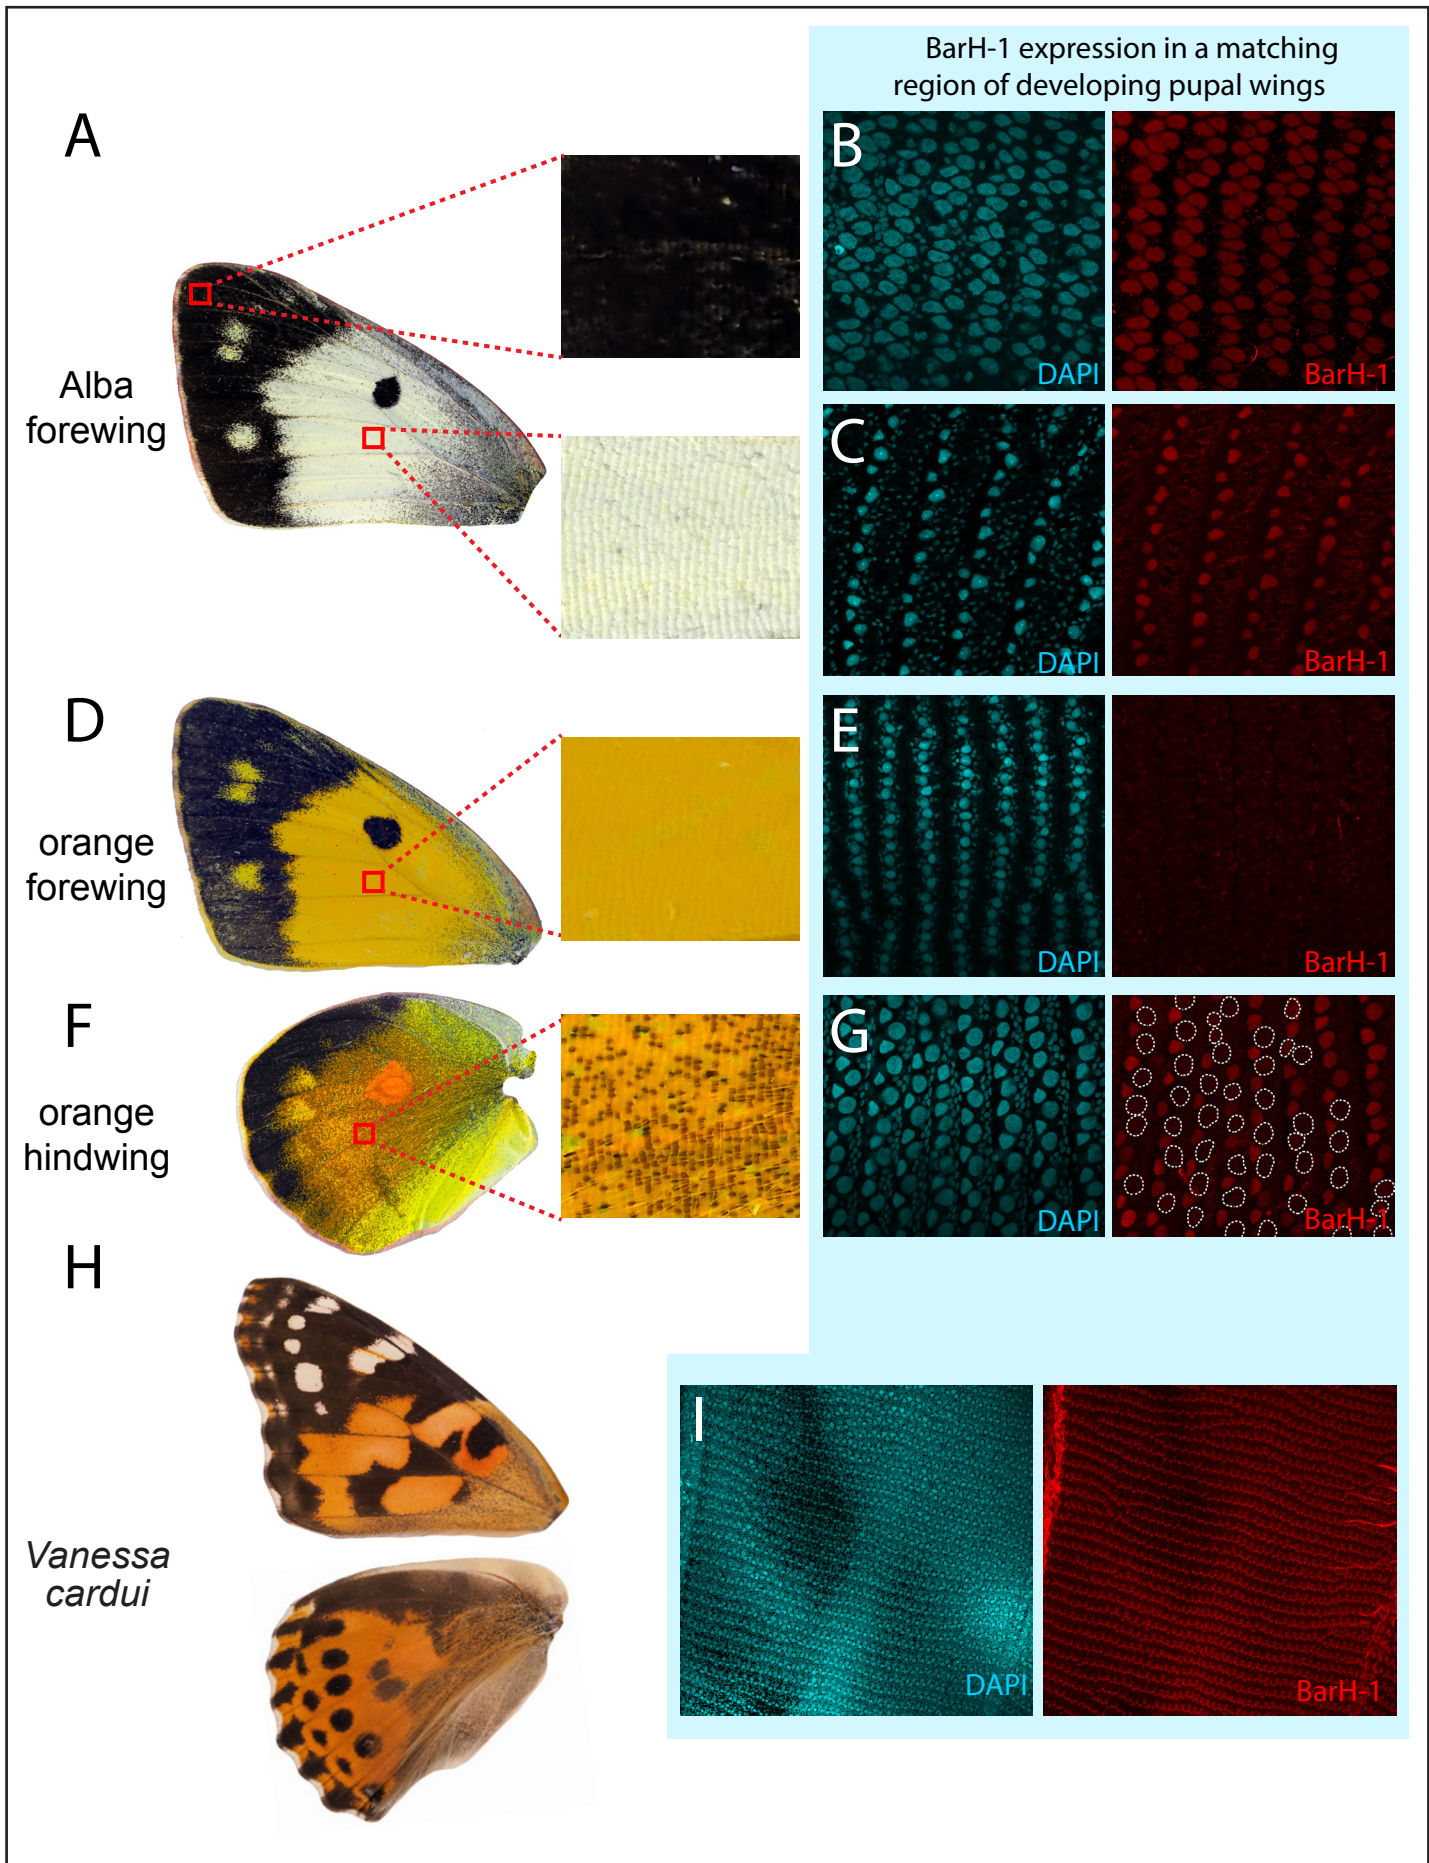

Figure 2

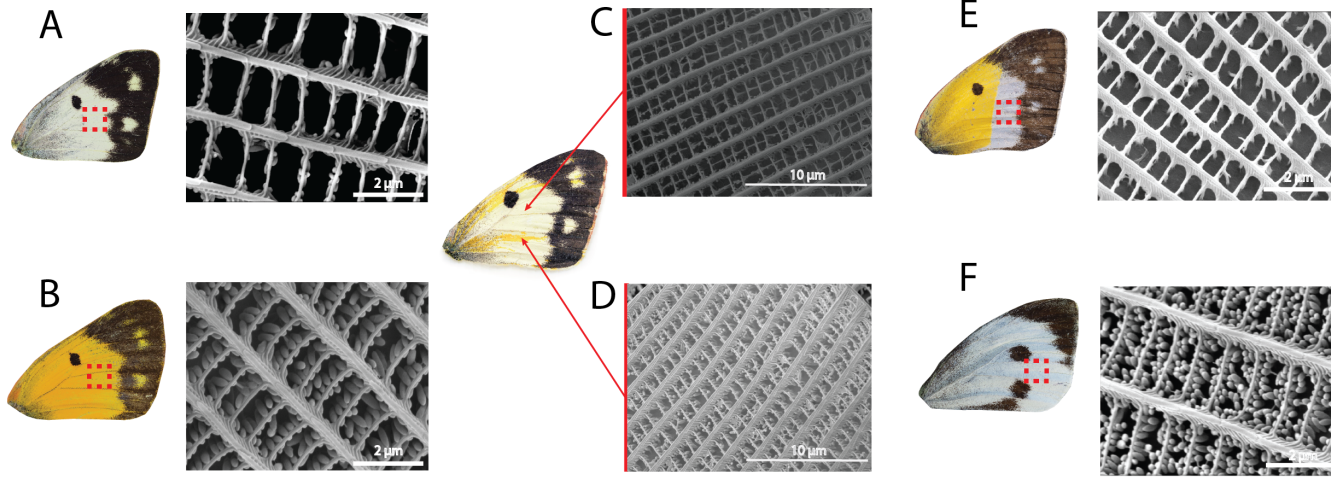

Figure 3

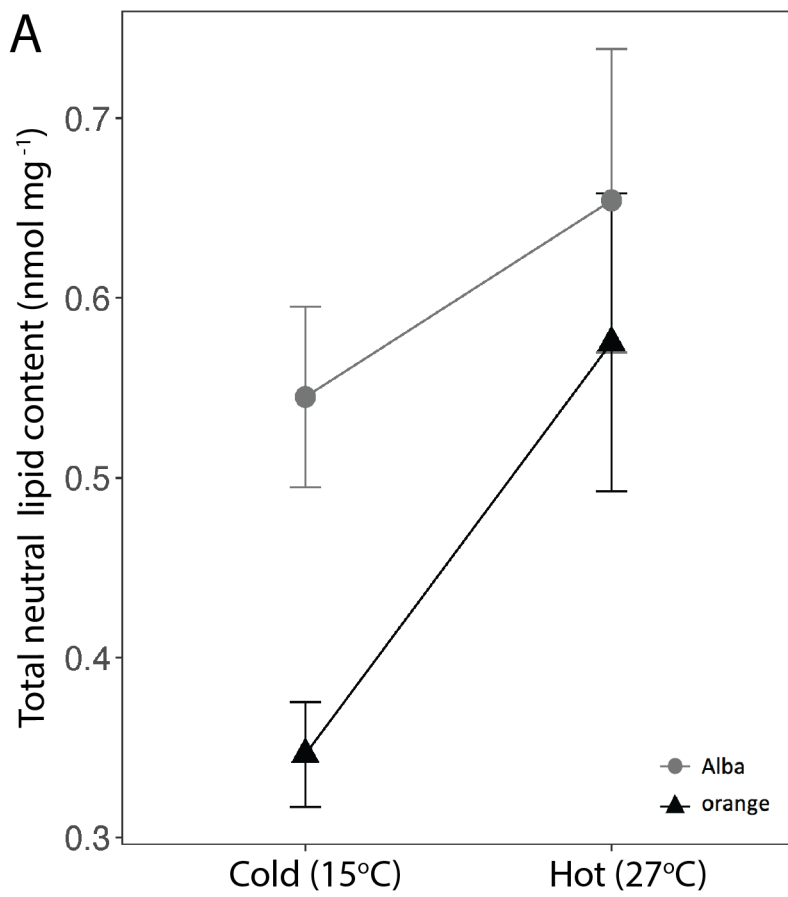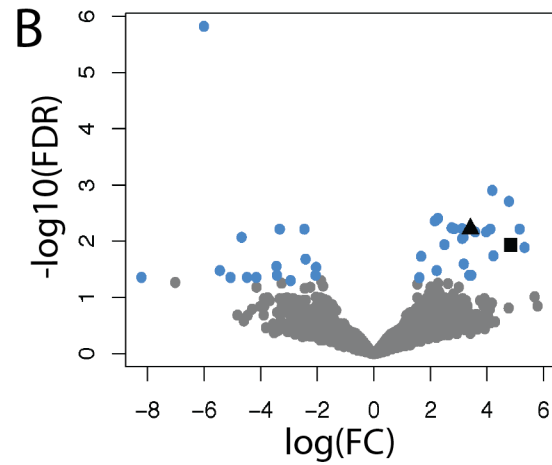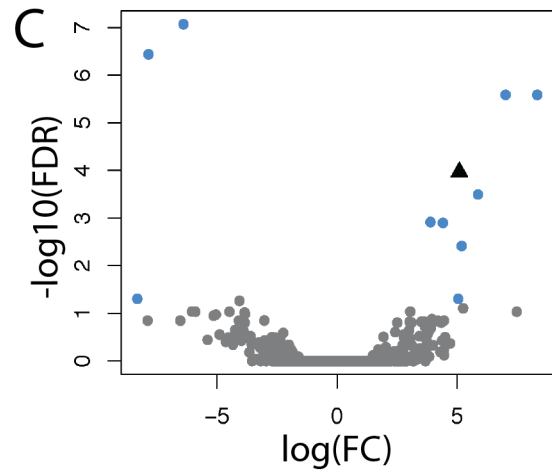

Figure 4
